# Supplementary material for: Characterization of colorimetric sensor arrays by a multi-spectral technique
Source: Royal Society of Chemistry journal article supplement (doi:10.1039/c5ay03255e), 2016-01-01
Supplement: c5ay03255e1.pdf [file c5ay03255e1.pdf]

## Supplementary data

# Characterization of colorimetric sensor array by multi-spectral technique

Li Zhihua<sup>a</sup> Zhou Xucheng<sup>a</sup> Zou Xiaobo<sup>a,\*</sup> Shi Jiyong<sup>a</sup> Huang Xiaowei<sup>a</sup> Haroon

Elrasheid Tahir<sup>a</sup> Shen Tingting<sup>a</sup>

<sup>a</sup> *College of Food and Biological Engineering, Jiangsu University, Zhenjiang 212013, China*

---

\* *Corresponding author. Tel: +86 511 88780085; Fax: +86 511 88780201  
Email address: zou\_xiaobo@ujs.edu.cn*

## 1. Colorimetric sensor array preparation

TiO<sub>2</sub> porous film was prepared by blending 3 g TiO<sub>2</sub> powder (P-25), 0.1 ml acetylacetone and 5 ml distilled water in a 35 ml agate mortar, and the mixture was stirred for 30 min. Then the mixture of 1.0 ml alcohol and 0.1 ml emulsification agents (octylphenylether polyethylene) was slowly added into the mortar with stirring continuously for 30 min. The TiO<sub>2</sub> paste was spread onto the glass using a doctor blade scraping technique. Finally, the TiO<sub>2</sub> nanoporous film was dried and sintered by firing the glass sheet at 450°C in air for 4 h.

Certain amount of the selected dyes (0.1 M) were dissolved in chloroform or alcohol and printed on prepared TiO<sub>2</sub> porous film plate using microcapillary pipettes. Then these plates were dried in oven at 40°C and maintained in dark and sealed condition.

## 2. Standard NH<sub>3</sub> generation

The NH<sub>3</sub> permeation tube with NH<sub>3</sub> liquor inside was the gas generation source. When fixed to the constant temperature bath, the volume of NH<sub>3</sub> permeated through the tube wall for unit time become constant. At this time, additional supply of nitrogen (N<sub>2</sub>) as the dilution gas in a certain quantity generates standard gas with arbitrary micro-concentration which will be stabilized for a long time. The concentration of the NH<sub>3</sub> vapor in the stream of N<sub>2</sub> can be obtained by the following formula:

$$C = \frac{K \times Pr \times L}{F} \quad (1)$$

where C is the concentration of NH<sub>3</sub> (ppm). Pr is the permeation rate (134 ng/min/cm). L is the effective length of tube (10 cm). F is the flow rate of nitrogen (ml/min). K is the factor to convert the weight to volume of the gas (1.44 L/g). Furthermore, the different humidity levels (%RH) were created by controlling the feeding of mixing nitrogen/water vapors at different ratio.

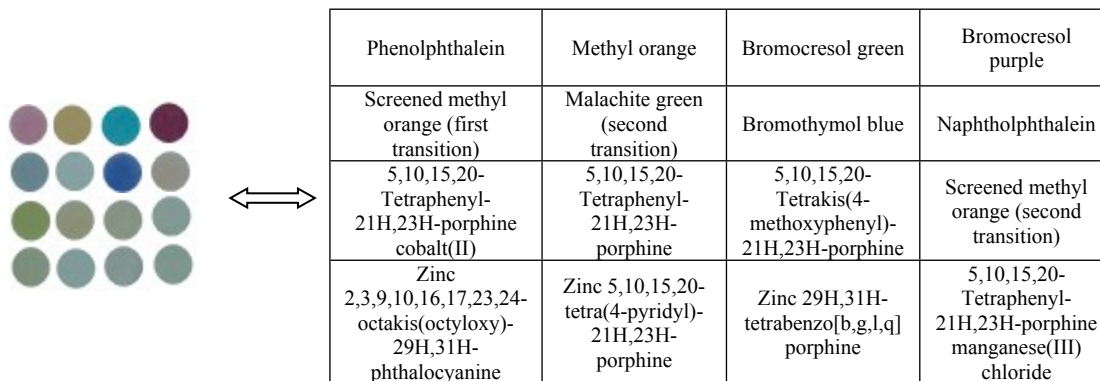

**Fig.S1** Dyes used for colorimetric sensor array

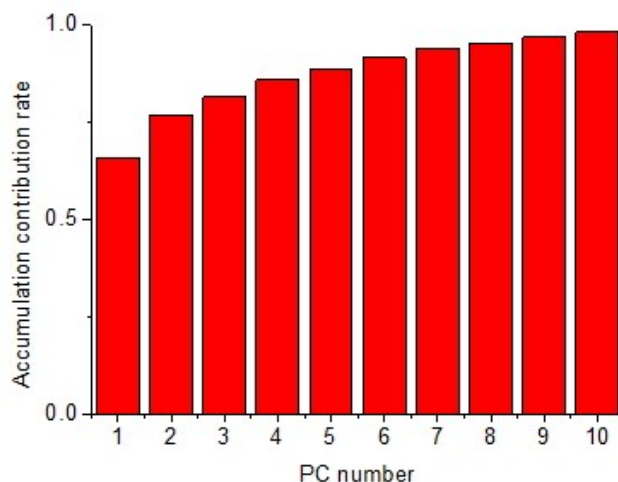

**Fig.S2** Cumulative contributions of the top 10 PCs.

Table S1. The optimum characteristic wavelengths for all 16 dyes and the transmission wavelengths of the filters used for each dye.

| Name               | Optimum characteristic wavelengths(nm) | Used filters                    |
|--------------------|----------------------------------------|---------------------------------|
| Bromocresol purple | 794, 828, 530                          | BP540/10K, BP808/10K, BP935/30K |
| Naphtholphthalein  | 791, 830, 939                          | BP619/10K, BP808/10K, BP935/30K |
| Methyl orange      | 619, 809, 931                          | BP619/10K, BP808/10K, BP935/30K |
| Phenolphthalein    | 620, 799, 933                          | BP619/10K, BP808/10K, BP935/30K |
| Naphtholphthalein  | 689, 789, 941                          | BP619/10K, BP808/10K, BP935/30K |
| Bromothymol blue   | 663, 838, 933                          | BP619/10K, BP808/10K, BP935/30K |

---

|                                                                                   |               |                                 |
|-----------------------------------------------------------------------------------|---------------|---------------------------------|
| Malachite green<br>(second transition)                                            | 550, 626, 934 | BP540/10K, BP619/10K, BP935/30K |
| Screened methyl<br>orange (first transition)                                      | 797, 840, 938 | BP619/10K, BP808/10K, BP935/30K |
| Screened methyl<br>orange (second<br>transition)                                  | 613, 828, 936 | BP619/10K, BP808/10K, BP935/30K |
| 5,10,15,20-Tetrakis(4-<br>methoxyphenyl)-<br>21H,23H-porphine                     | 603, 788, 935 | BP619/10K, BP808/10K, BP935/30K |
| 5,10,15,20-<br>Tetraphenyl-21H,23H-<br>porphine                                   | 605, 792, 932 | BP619/10K, BP808/10K, BP935/30K |
| 5,10,15,20-<br>Tetraphenyl-21H,23H-<br>porphine cobalt(II)                        | 611, 799, 921 | BP619/10K, BP808/10K, BP935/30K |
| 5,10,15,20-<br>Tetraphenyl-21H,23H-<br>porphine<br>manganese(III) chloride        | 589, 789, 938 | BP619/10K, BP808/10K, BP935/30K |
| Zinc 29H,31H-<br>tetrabenzo[b,g,l,q]<br>porphine                                  | 797, 885, 934 | BP619/10K, BP808/10K, BP935/30K |
| Zinc 5,10,15,20-tetra(4-<br>pyridyl)-21H,23H-<br>porphine                         | 534, 826, 909 | BP540/10K, BP808/10K, BP935/30K |
| Zinc<br>2,3,9,10,16,17,23,24-<br>octakis(octyloxy)-<br>29H,31H-<br>phthalocyanine | 786, 540, 941 | BP540/10K, BP808/10K, BP935/30K |

---
